# Supplementary material for: CuCl catalyst heterogenized on diamide immobilized SBA-15 for efficient oxidative carbonylation of methanol to dimethylcarbonateElectronic supplementary information (ESI) available: XPS and Auger spectra of the SBA–diamide–CuCl sample. See http://www.rsc.org/suppdata/cc/b3/b301375h/
Source: Royal Society of Chemistry journal article supplement (doi:10.1039/b301375h), 2003-03-10
Supplement: b301375h.doc [file b301375h.doc]

Electronic Supplementary Information for

“*CuCl catalyst heterogenized on diamide immobilized SBA-15 for efficient oxidative carbonylation of methanol to dimethylcarbonate*”

Yong Cao*, Ping Yang, Wei-Lin Dai, Kang-Nian Fan*, Jun-Cheng Hu

*Shanghai Key Laboratory of Molecular Catalysis and Innovative Materials, Department of Chemistry, Fudan University, Shanghai 200433, P. R. China*

**Fig. 1S** Cu (2p3/2) X-ray photoelectron spectra for the SBA-15-diamide-CuCl sample.

**Fig. 2S**. Cu (LMM) Auger spectra for the as prepared SBA-15-diamide-CuCl sample. For the sake of comparison, the reference sample of standard Cu2O is also included.
